# Supplementary material for: Efficient and stable InP quantum-dot light-emitting diodes formed by premixing 2-hydroxyethyl methacrylate into ZnMgO
Source: Royal Society of Chemistry journal article supplement (doi:10.1039/d4tc00837e), 2024-01-01
Supplement: d4tc00837e1.pdf [file d4tc00837e1.pdf]

## Electronic Supporting Information

### Efficient and stable InP quantum-dot light-emitting diodes by premixing 2-hydroxyethyl methacrylate into ZnMgO

*Yeseul Park, Minhyung Lee, Hansol Seo, Doyoon Shin, Donghyo Hahm, Wan Ki Bae, Jaehoon Kim,\* and Jeonghun Kwak\**

Y. Park, M. Lee, H. Seo, J. Kwak

Department of Electrical and Computer Engineering, Inter-university Semiconductor Research Center, and Soft Foundry Institute, Seoul National University, Seoul, 08826, Republic of Korea

E-mail: jkwak@snu.ac.kr

D. Shin, D. Hahm, W. K. Bae

SKKU Advanced Institute of Nano Technology (SAINT), Sungkyunkwan University, Suwon, 16419, Republic of Korea

J. Kim

Department of Electronic Engineering, Gachon University 1342 Seongnam-daero, Sujeong-gu, Seongnam-si, Gyeonggi-do 13120, Republic of Korea

E-mail: jaehoonkim@gachon.ac.kr

Department of Energy and Mineral Resources Engineering, Dong-A University, Busan, 49315, Republic of Korea

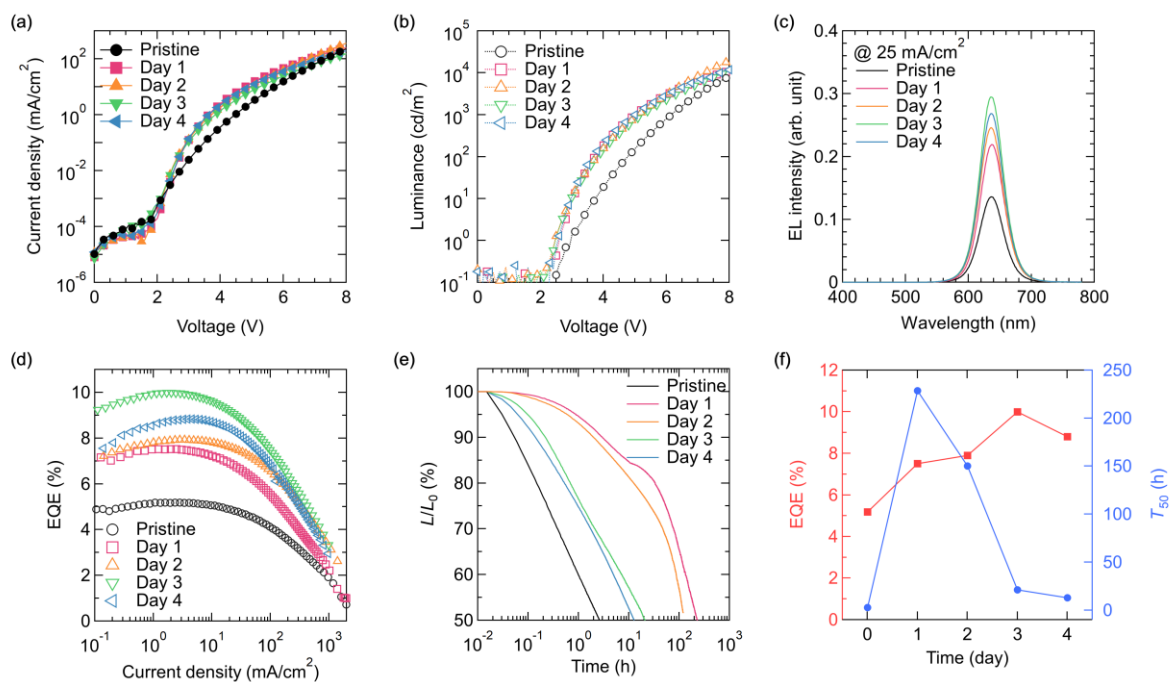

**Fig. S1** (a)  $J$ - $V$  characteristics, (b)  $L$ - $V$  characteristics, (c) EL spectra, (d) EQE, (e) operational lifetime, and (f) summarized performance tendencies of acidic resin-treated QLEDs as a function of aging time.

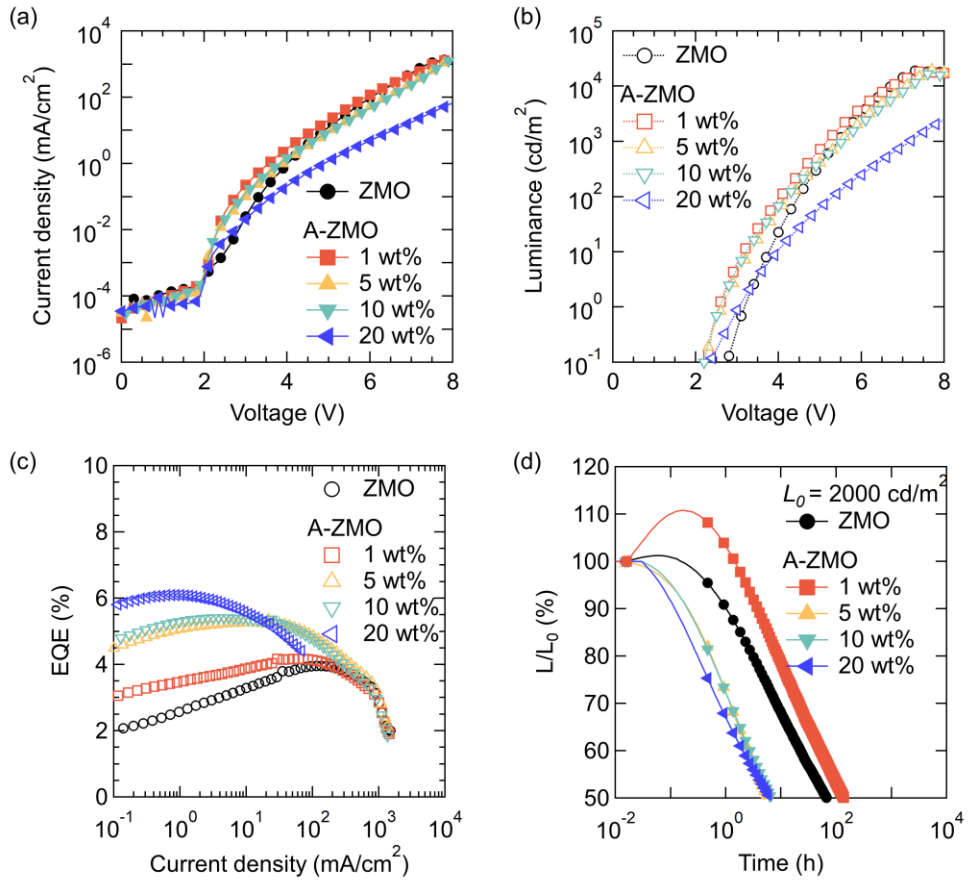

**Fig. S2** (a)  $J-V$  characteristics, (b)  $L-V$  characteristics, (c) EQE, and (d) operational lifetime of QLEDs with ETLs of acrylic acid-premixed ZnMgO (A-ZMO) with various mixing ratios ranging from 1 to 20 wt%.

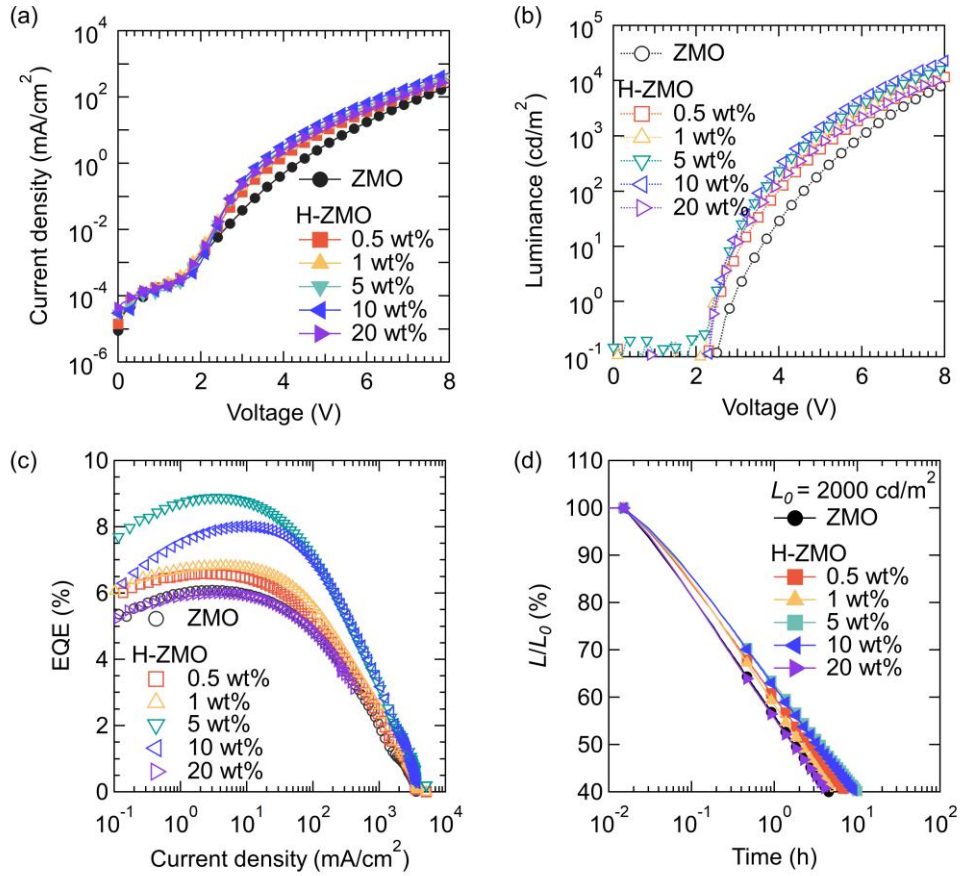

**Fig. S3** (a)  $J$ - $V$  characteristics, (b)  $L$ - $V$  characteristics, (c) EQE, and (d) operational lifetime of QLEDs with ETLs of 2-hydroxyethyl methacrylate (HEMA)-premixed ZnMgO (H-ZMO) with various mixing ratios ranging from 0.5 to 20 wt%.

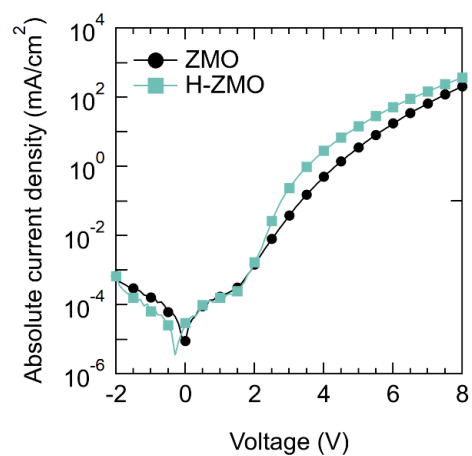

**Fig. S4**  $J$ - $V$  characteristics ranging from reverse bias of 2 V to forward bias of 8 V of QLEDs with pristine ZMO and H-ZMO, showing a saturation current density on the scale of  $10^{-3}$  mA/cm<sup>2</sup>.

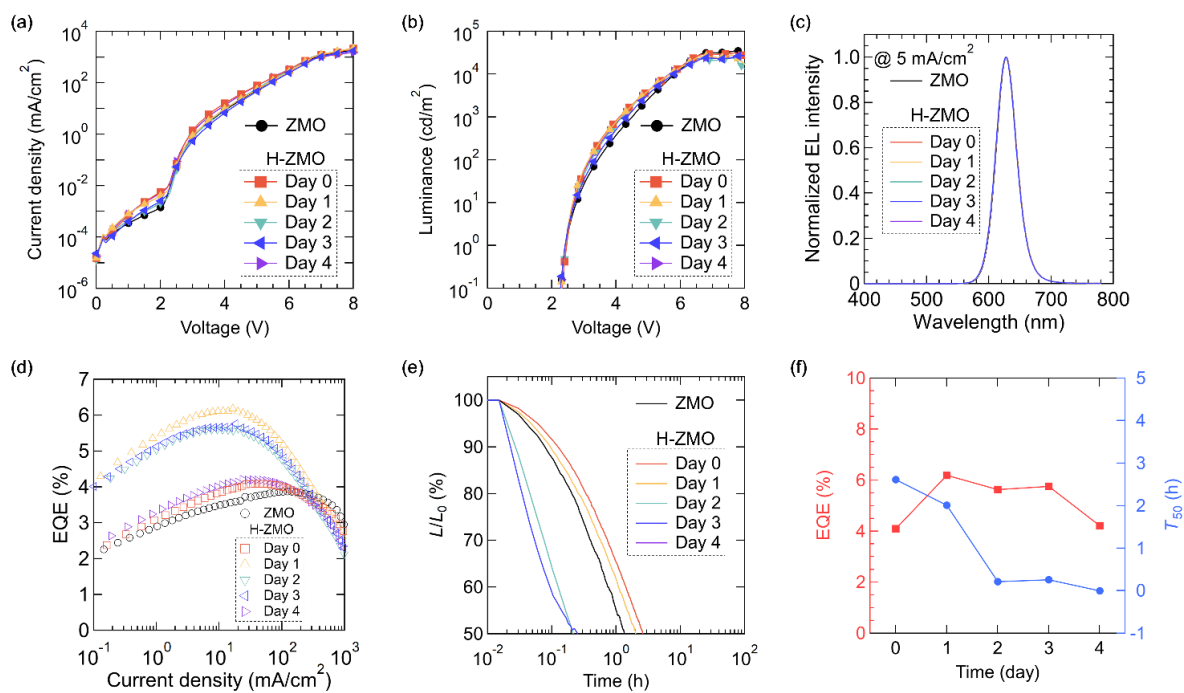

**Fig. S5** (a)  $J-V$  characteristics, (b)  $L-V$  characteristics, (c) EL spectra, (d) EQE, (e) operational lifetime and (f) summarized performance tendencies of QLEDs with H-ZMO as a function of aging time.

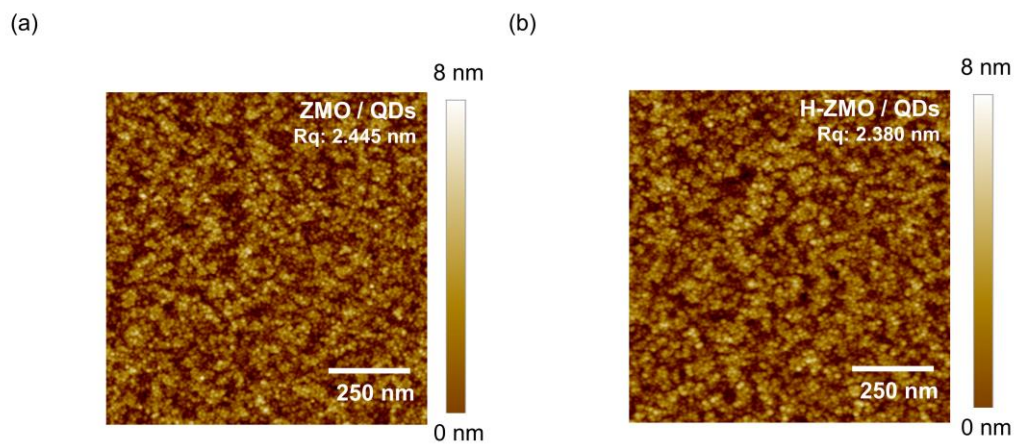

**Fig. S6** Surface topography images of (a) ZMO/QDs and (b) H-ZMO/QDs films.

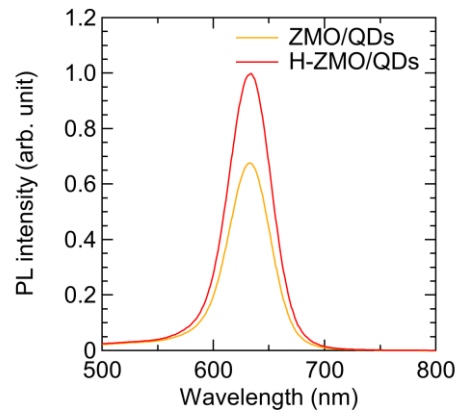

**Fig. S7** PL spectra of the red InP QDs deposited on ZMO and H-ZMO films.



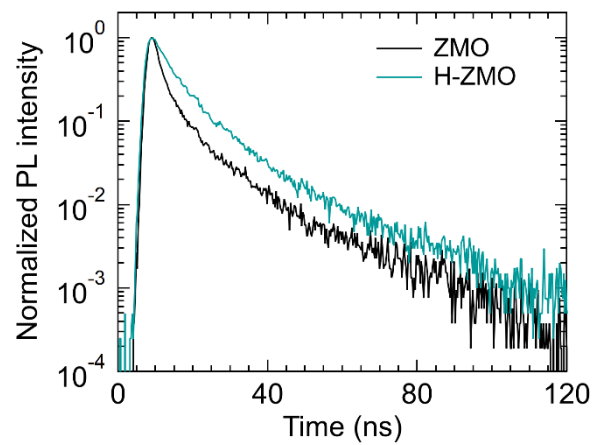

**Fig. S8** Normalized time-resolved PL intensities of QDs on the pristine ZMO and H-ZMO films.

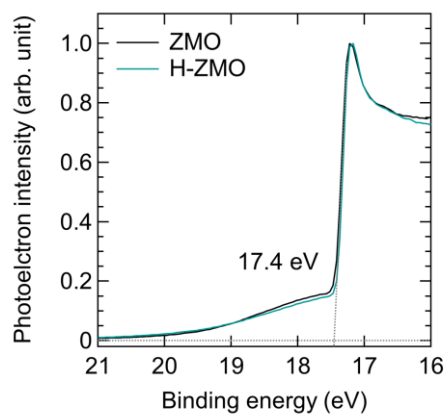

**Fig. S9** Cut-off region of the UPS spectra of the ZMO and H-ZMO films.

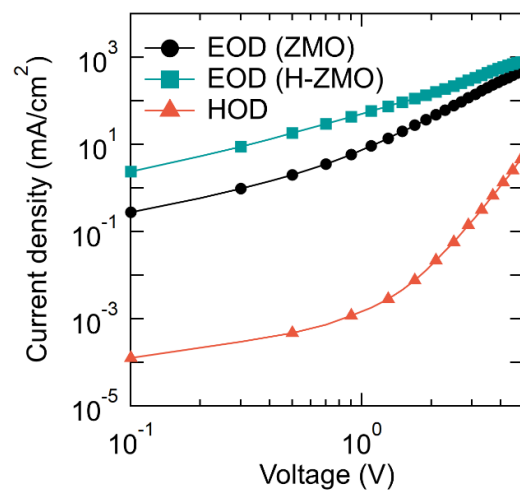

**Fig. S10**  $J$ - $V$  characteristics of EOD (ITO / ZMO or H-ZMO / QD / Al) and HOD (ITO / PEDOT:PSS / QD / TCTA / MoO<sub>3</sub> / Al).

**Table S1.** Composition and information on ingredients of UV-resin (LOCTITE 366).<sup>(a)</sup>

| <b>Component</b>                                            | <b>CAS Number</b> | <b>Percentage (wt%)</b> |
|-------------------------------------------------------------|-------------------|-------------------------|
| 2-Hydroxyethyl methacrylate                                 | 868-77-9          | 30–35                   |
| Isobornyl methacrylate                                      | 7534-94-3         | 10–15                   |
| Hydroxyalkyl methacrylate                                   | 27813-02-1        | 1–5                     |
| Acrylic acid                                                | 79-10-7           | 1–2.5                   |
| Ethanone, 2,2-dimethoxy-1,2-diphenyl-                       | 24650-42-8        | 1-2.5                   |
| Cumene hydroperoxide                                        | 80-15-9           | 0.25–1                  |
| Methacrylic acid                                            | 79-41-4           | < 1                     |
| 1-Acetyl-2-phenylhydrazine                                  | 114-83-0          | 0.1–1                   |
| 2-Propenoic acid, 2-methyl-, 2-(2-hydroxyethoxy)ethyl ester | 2351-43-1         | < 1                     |

<sup>(a)</sup> All data were obtained from the safety data sheet of LOCTITE AA 366.
